# Supplementary material for: Recognition of trace organic pollutant and toxic metal ions via a tailored fluorescent metal–organic coordination polymer in water environment
Source: Royal Society of Chemistry journal article supplement (doi:10.1039/c8ra05502e), 2018-01-01
Supplement: c8ra05502e1.pdf [file c8ra05502e1.pdf]

**Supporting Information:**

**Recognition of trace organic pollutant and toxic metal ion using a tailored  
fluorescent metal-organic coordination polymer in water environment**

Danfeng He<sup>ab</sup>, Shumei Liu<sup>a</sup>, Yiwei Liu<sup>a</sup>, Fang Luo<sup>a</sup> and Shuxia Liu<sup>a\*</sup>

---

<sup>a</sup> Key Laboratory of Polyoxometalate Science of the Ministry of Education, College of Chemistry, Northeast Normal University, Changchun, Jilin 130024, China.

<sup>b</sup> Key Laboratory of Oilfield Applied chemistry, College of Chemical Engineering, Daqing Normal University, Daqing, Heilongjiang 163712, China.

Correspondence information:

Shu-Xia Liu, Northeast Normal University,

5268 RenminStreet, Changchun 130024, Jilin Province, P. R. China

liusx@nenu.edu.cn, Tel: +86-431-85098260

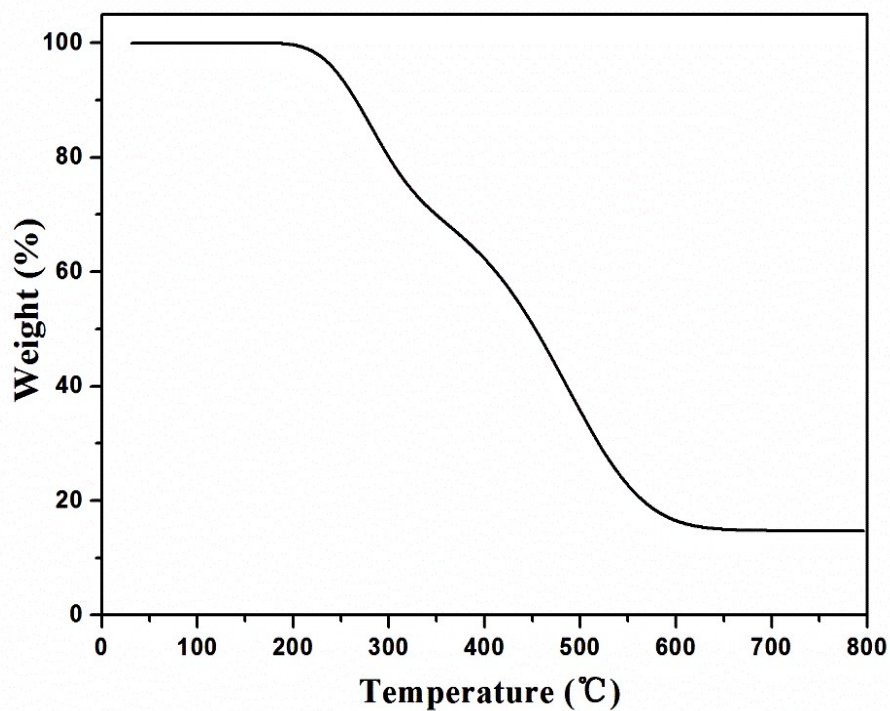

**Fig. S1** The thermogravimetric analysis (TGA) curve of the title complex  $\text{H}_2\text{Sr}_2(\text{bqdc})_3(\text{phen})_2$ .

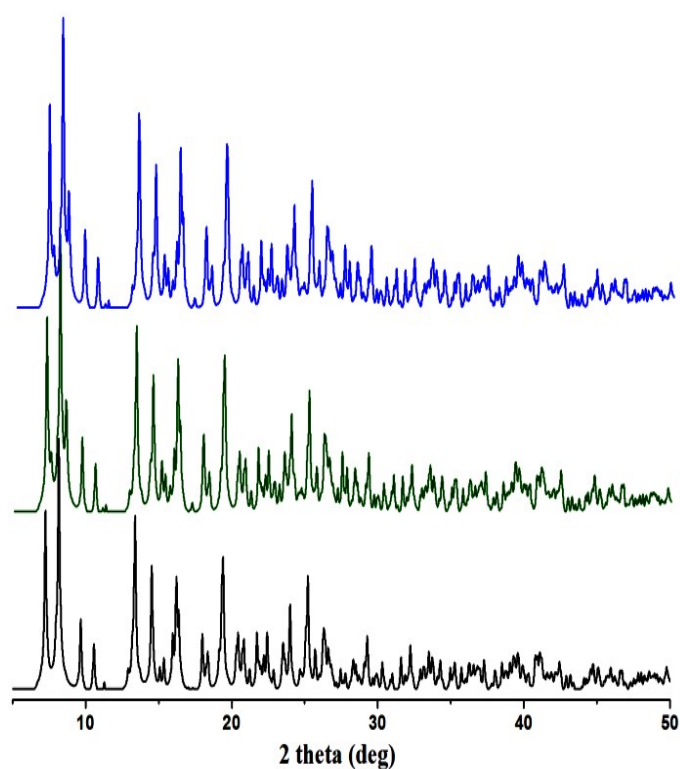

**Fig. S2** The simulated (black), as-synthesised (green) and treated to 100 °C (blue) PXRD of the complex  $\text{H}_2\text{Sr}_2(\text{bqdc})_3(\text{phen})_2$ .

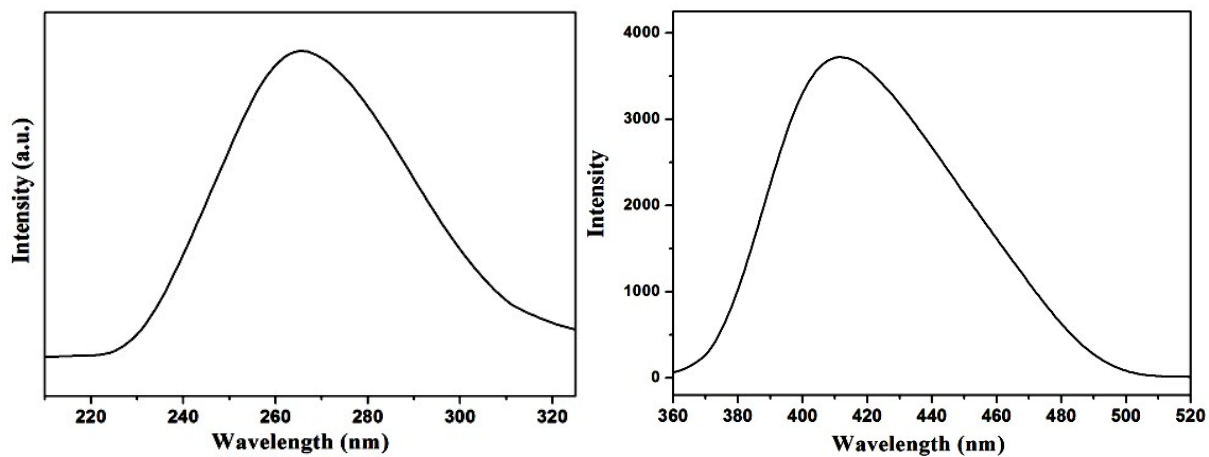

**Fig. S3** Excitation spectra and emission spectra ( 403 nm) of H<sub>2</sub>bqdc (excitation at 266 nm).

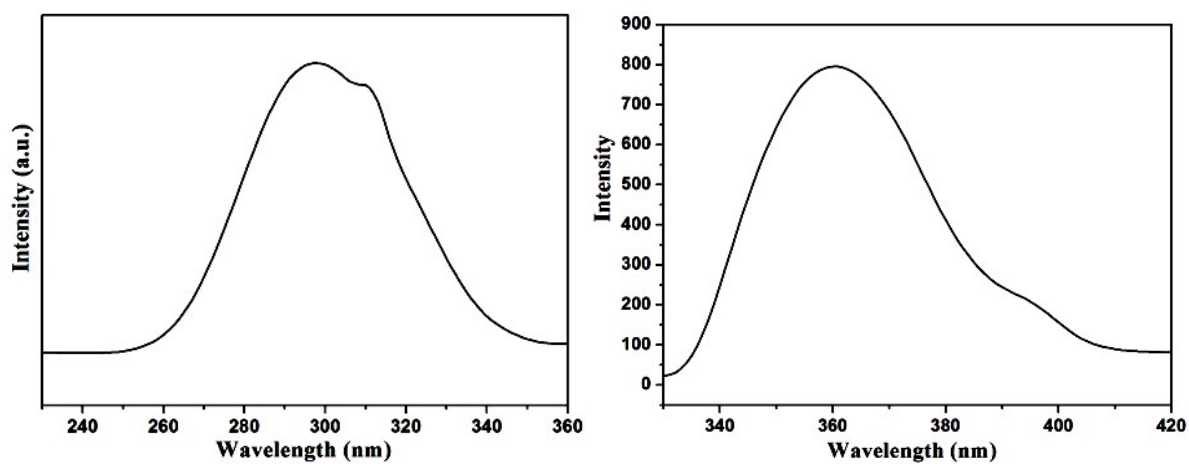

**Fig. S4** Excitation spectra and emission spectra ( 363 nm) of phen (excitation at 297 nm).

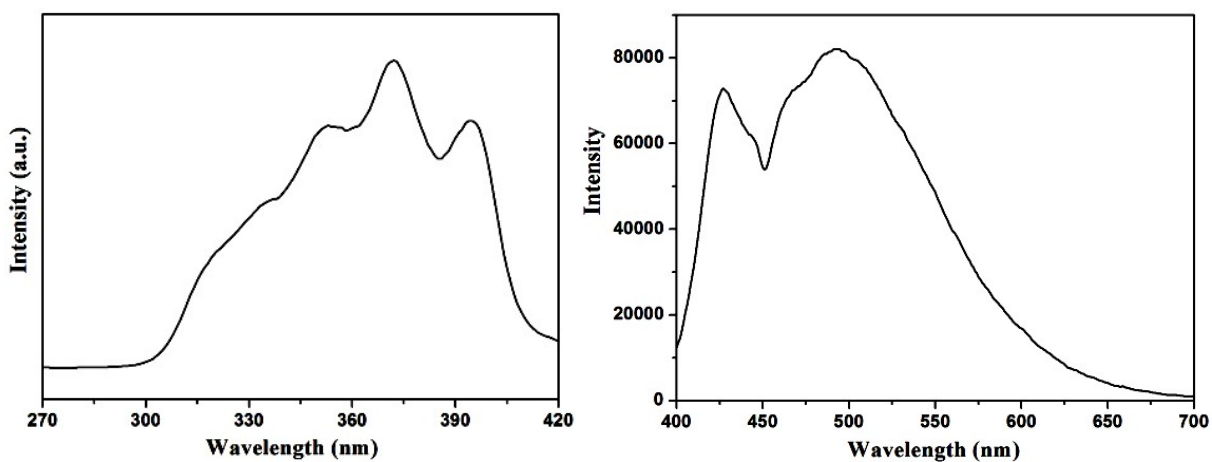

**Fig.S5** Excitation spectra and emission spectra of the complex (excitation at 365 nm).

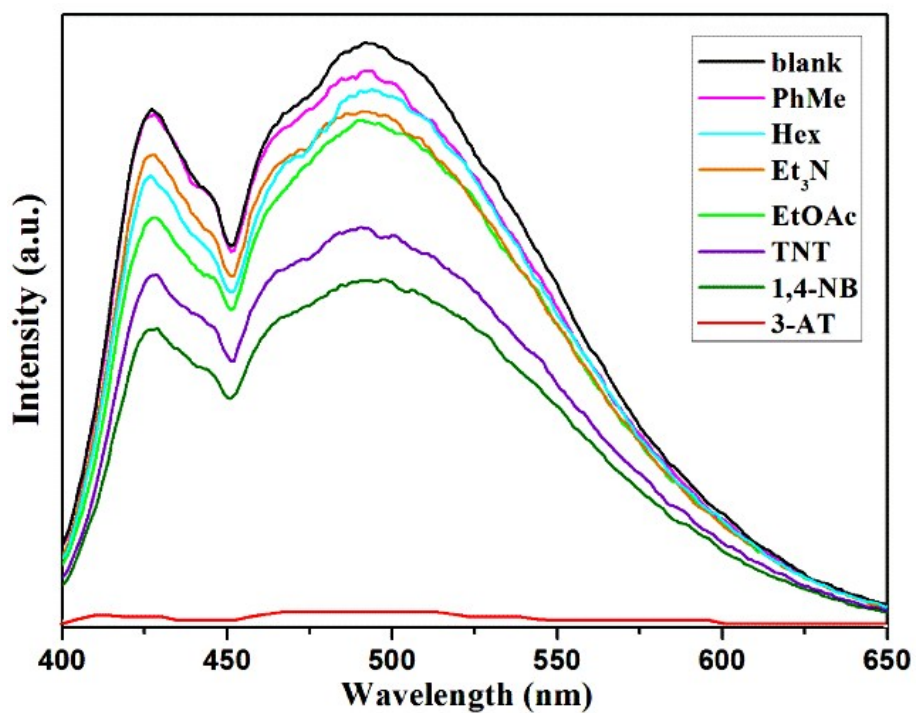

**Fig. S6** Fluorescence responses of complex with different organic molecules ( $1 \times 10^{-3}$  mol L<sup>-1</sup>, excited at 365 nm).

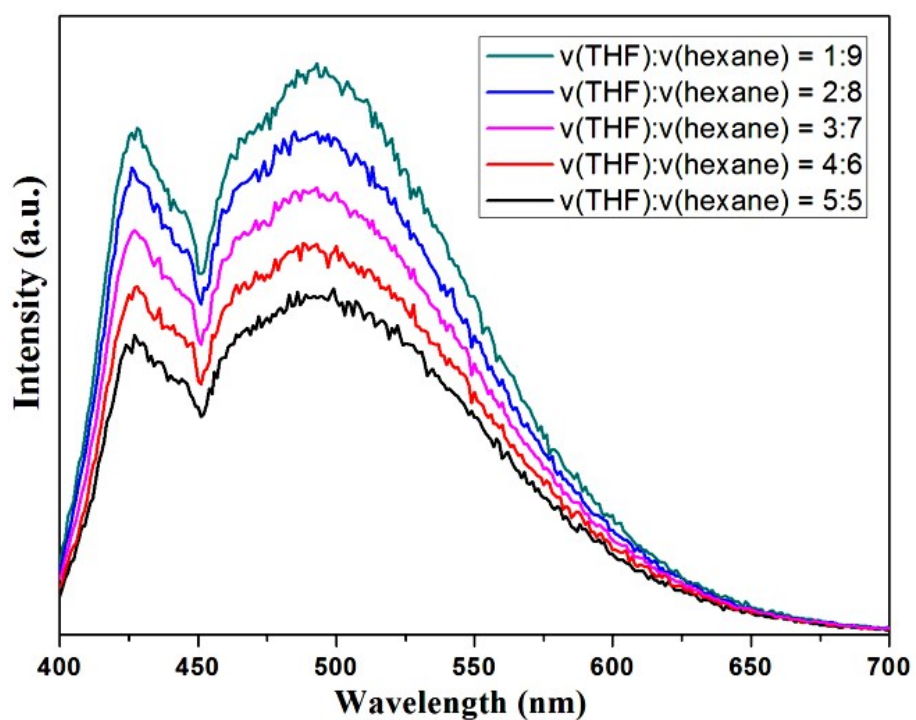

**Fig. S7** The fluorescence intensities of samples in mixed solvent of THF/hexane with different proportion.

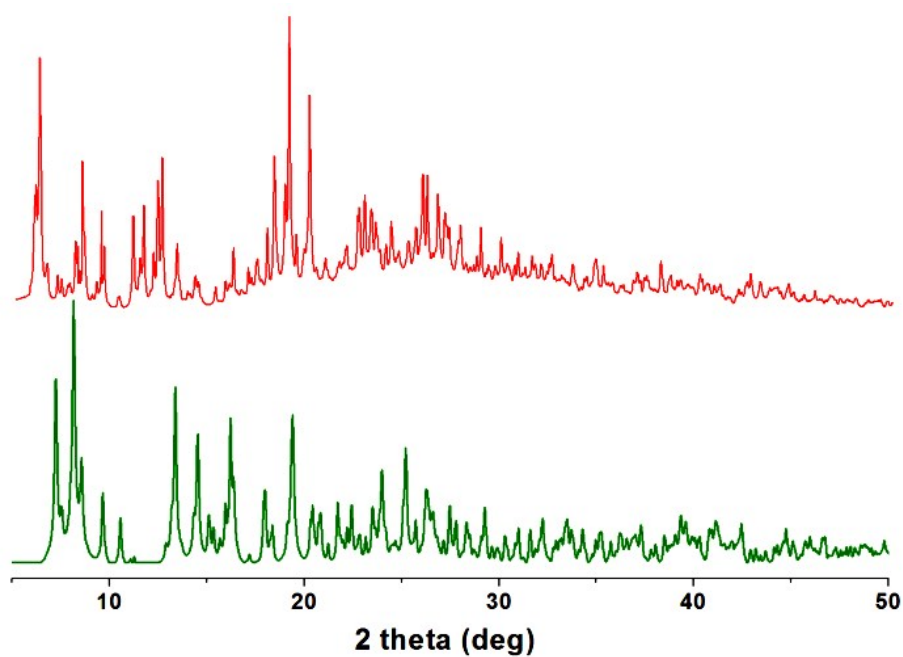

**Fig.S8** The PXR D of as-synthesised (green) and interacted with 3-AT(red)  $H_2Sr_2(bqdc)_3(phen)_2$ .

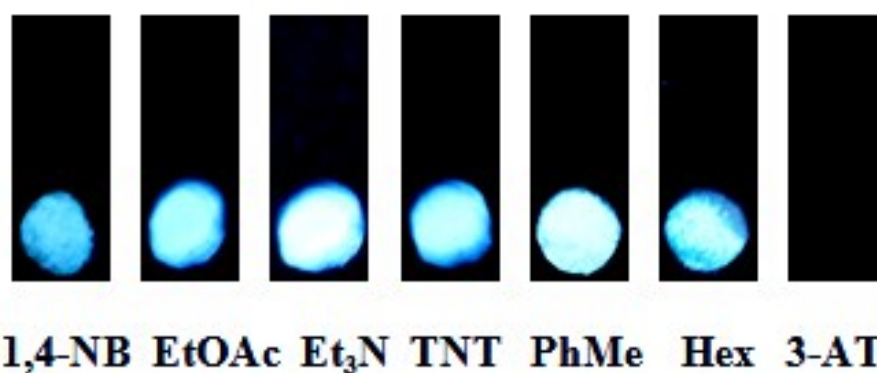

**Fig. S9** The test strips of  $H_2Sr_2(bqdc)_3(phen)_2$  upon different organic molecules under UV light.

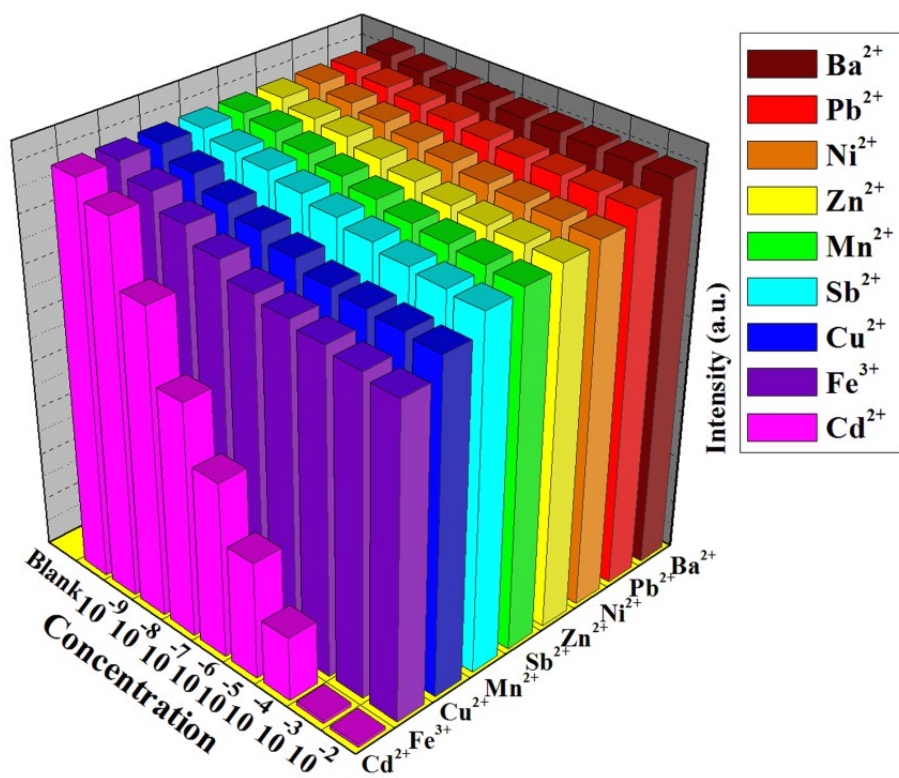

**Fig. S10** Fluorescence quenching results upon different concentrations(mol L<sup>-1</sup>) of the complex with different metal ions.



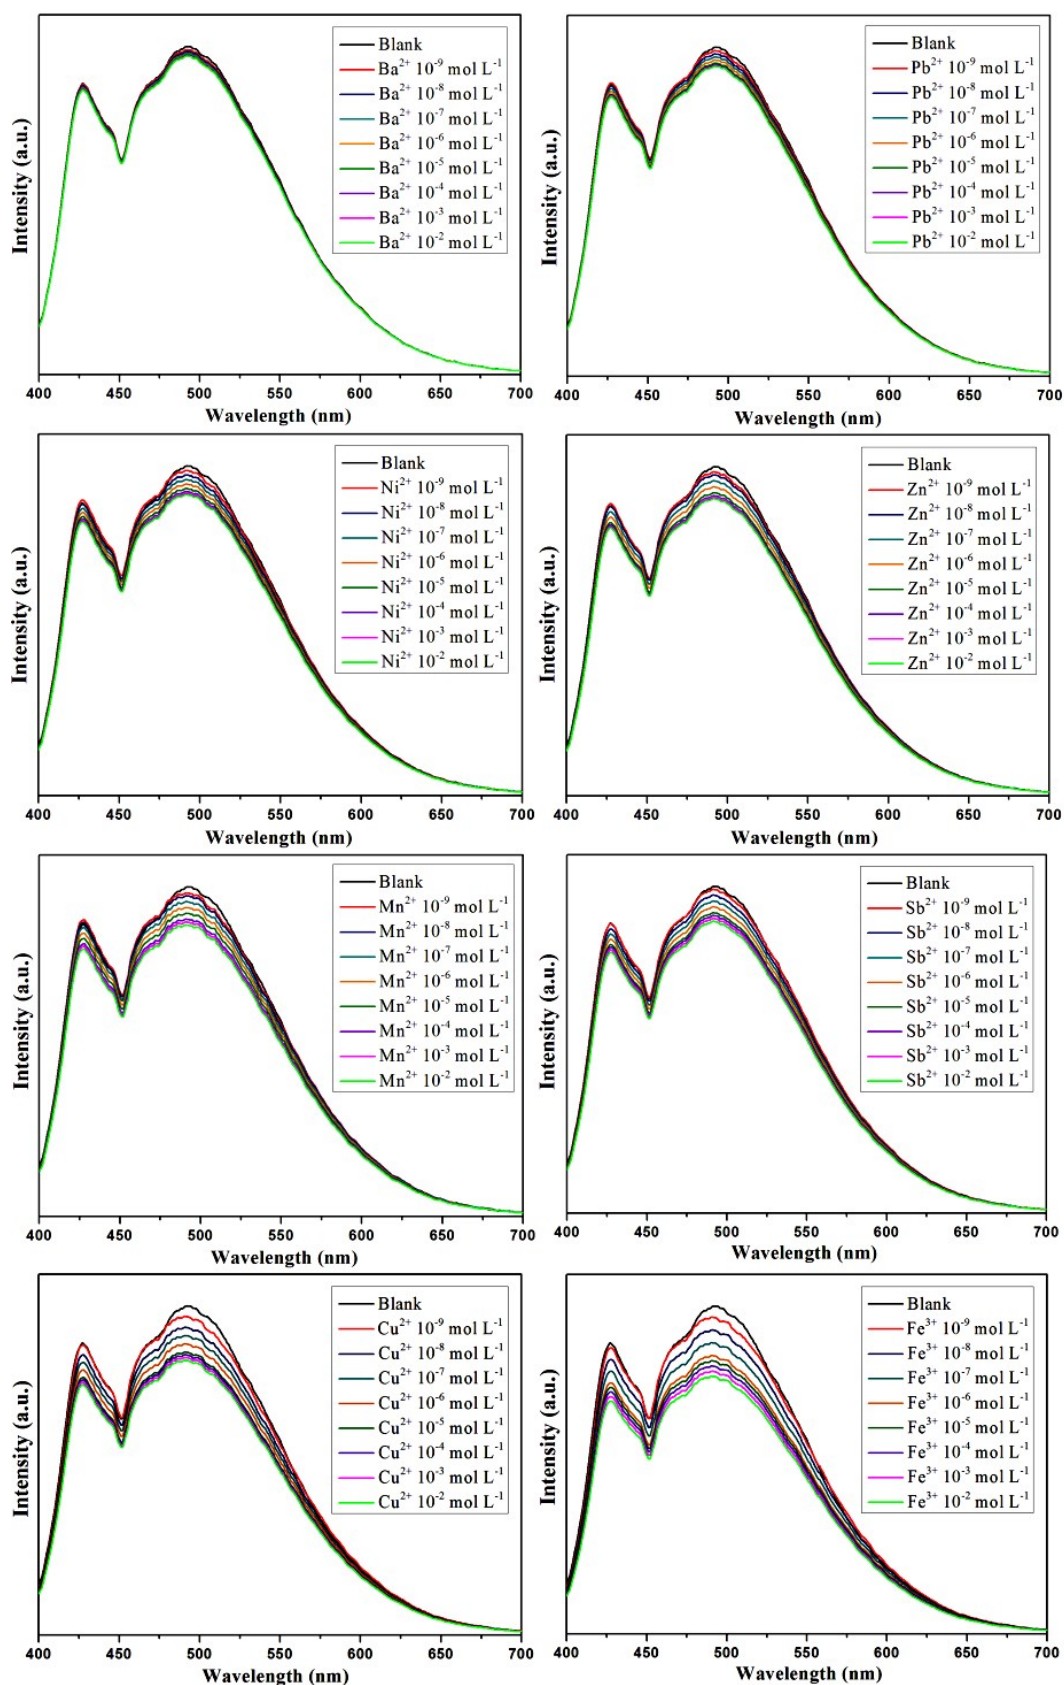

**Fig.S11** Fluorescence responses of the complex of different metal ions with different concentrations (excitation at 365 nm).

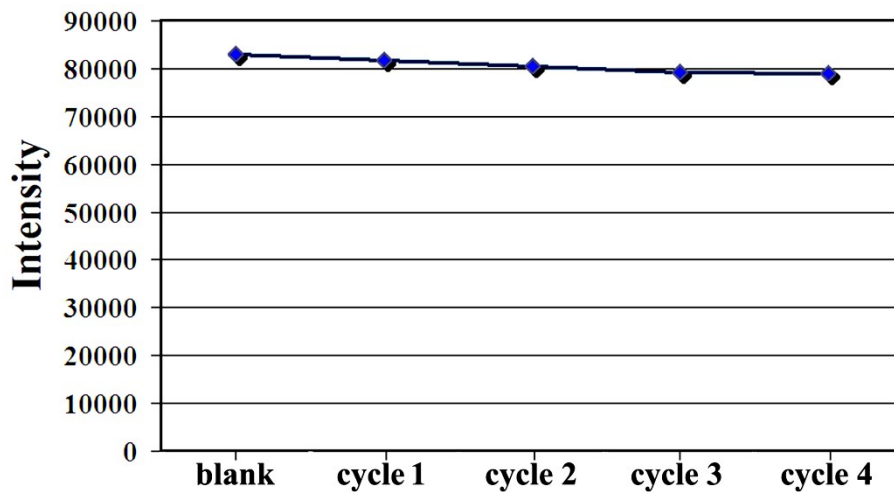

**Fig. S12** Reusability of the complex  $\text{H}_2\text{Sr}_2(\text{bqdc})_3(\text{phen})_2$  on the sensing of  $\text{Cd}^{2+}$  metal ion.

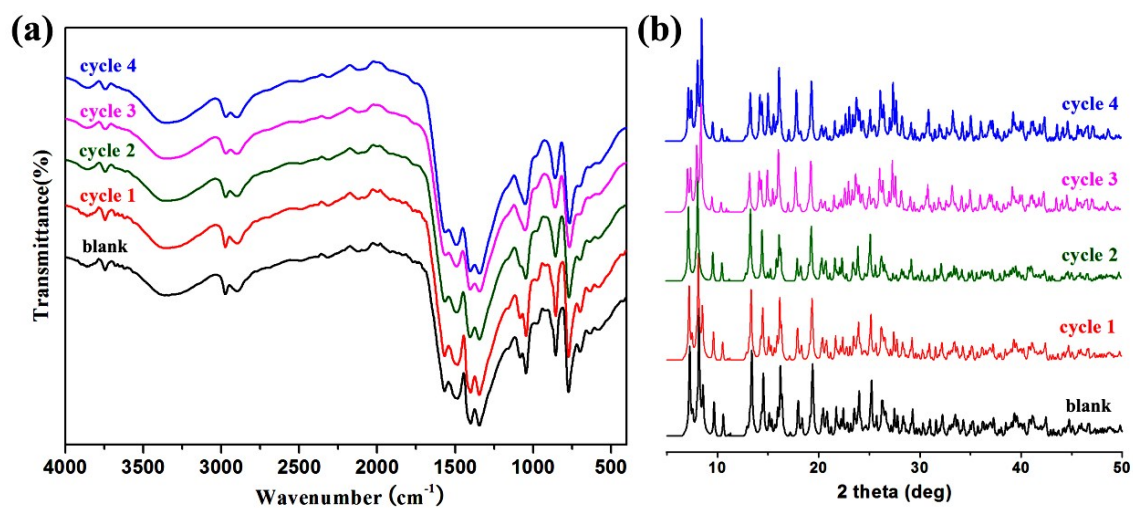

**Fig. S13** (a) The IR spectra of  $\text{H}_2\text{Sr}_2(\text{bqdc})_3(\text{phen})_2$  for the four cycles. (b) The XRD patterns of  $\text{H}_2\text{Sr}_2(\text{bqdc})_3(\text{phen})_2$  for the four cycles.



**Table S1** The structures of organic molecules and fluorescence response values of the complex with different organic molecules ( $1 \times 10^{-3}$  mol L<sup>-1</sup>, excited at 365 nm).

|   | Organic molecule                  | Structure                                                                           | Fluorescence intensity | quenching efficiency |
|---|-----------------------------------|-------------------------------------------------------------------------------------|------------------------|----------------------|
| 1 | 1,4-dinitro-benzen(1,4-NB)        | 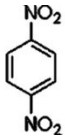   | 49074.35               | 40.57%               |
| 2 | 2,4,6-trinitrotoluene(TNT)        |    | 56454.93               | 31.64%               |
| 3 | ethyl acetate (EtOAc)             |    | 72003.75               | 12.81%               |
| 4 | hexane (Hex),                     |    | 72662.16               | 12.01%               |
| 5 | toluene (PhMe)                    |   | 76985.08               | 6.78%                |
| 6 | triethylamine (Et <sub>3</sub> N) |  | 75069.89               | 9.10%                |
| 7 | amitrole (3-AT)                   |  | 1175.41                | 98.58%               |

**Table S2** Fluorescence quenching results upon complex with concentrations(mol L<sup>-1</sup>) of different metal ions(excitation at 365 nm).

| Concentration        | 0        | 1.00×10 <sup>-9</sup> | 1.00×10 <sup>-8</sup> | 1.00×10 <sup>-7</sup> | 1.00×10 <sup>-6</sup> | 1.00×10 <sup>-5</sup> | 1.00×10 <sup>-4</sup> | 1.00×10 <sup>-3</sup> | 1.00×10 <sup>-2</sup> |
|----------------------|----------|-----------------------|-----------------------|-----------------------|-----------------------|-----------------------|-----------------------|-----------------------|-----------------------|
| Cu <sup>2+</sup>     | 82581.26 | 79398.98              | 76661.08              | 74607.66              | 72554.24              | 70500.82              | 69816.34              | 69131.88              | 68446.34              |
| quenching efficiency | 0.00%    | 3.85%                 | 7.17%                 | 9.66%                 | 12.14%                | 14.63%                | 15.46%                | 16.29%                | 17.12%                |
| Fe <sup>3+</sup>     | 82581.26 | 79200.68              | 75981.14              | 72760.36              | 69542.06              | 68254.24              | 66966.44              | 65678.62              | 64390.82              |
| quenching efficiency | 0.00%    | 4.09%                 | 7.99%                 | 11.89%                | 15.79%                | 17.35%                | 18.91%                | 20.47%                | 22.03%                |
| Mn <sup>2+</sup>     | 82581.26 | 80479.44              | 79754.4               | 78304.32              | 76854.24              | 75404.16              | 73954.08              | 73229.04              | 72504.54              |
| quenching efficiency | 0.00%    | 2.55%                 | 3.42%                 | 5.18%                 | 6.94%                 | 8.69%                 | 10.45%                | 11.32%                | 12.20%                |
| Ni <sup>2+</sup>     | 82581.26 | 80902.8               | 79779.16              | 78655.5               | 77531.86              | 76408.22              | 75659.1               | 75284.56              | 74910.86              |
| quenching efficiency | 0.00%    | 2.03%                 | 3.39%                 | 4.75%                 | 6.11%                 | 7.48%                 | 8.38%                 | 8.84%                 | 9.29%                 |
| Ba <sup>2+</sup>     | 82581.26 | 81316.44              | 80917.84              | 80519.22              | 80120.62              | 79961.16              | 79881.44              | 79801.72              | 79723.66              |
| quenching efficiency | 0.00%    | 1.53%                 | 2.01%                 | 2.50%                 | 2.98%                 | 3.17%                 | 3.27%                 | 3.37%                 | 3.46%                 |
| Pb <sup>2+</sup>     | 82581.26 | 81180.18              | 80408.64              | 79635.48              | 78862.32              | 78089.16              | 77702.58              | 77470.64              | 77317.52              |
| quenching efficiency | 0.00%    | 1.70%                 | 2.63%                 | 3.57%                 | 4.50%                 | 5.44%                 | 5.91%                 | 6.19%                 | 6.37%                 |
| Sb <sup>2+</sup>     | 82581.26 | 81317.94              | 79852.74              | 78387.56              | 76922.38              | 75457.18              | 74724.58              | 73993.74              | 73259.4               |
| quenching efficiency | 0.00%    | 1.53%                 | 3.30%                 | 5.08%                 | 6.85%                 | 8.63%                 | 9.51%                 | 10.40%                | 11.29%                |
| Zn <sup>2+</sup>     | 82581.26 | 80752.32              | 80011.48              | 78529.78              | 77048.08              | 75566.44              | 74825.54              | 74455.12              | 74084.7               |
| quenching efficiency | 0.00%    | 2.21%                 | 3.11%                 | 4.91%                 | 6.70%                 | 8.49%                 | 9.39%                 | 9.84%                 | 10.29%                |
| Cd <sup>2+</sup>     | 82581.26 | 78020.36              | 64390.8               | 49062.52              | 36796.34              | 24530.36              | 13492.38              | 816.72                | 813.09                |
| quenching efficiency | 0.00%    | 5.52%                 | 22.03%                | 40.59%                | 55.44%                | 70.30%                | 83.66%                | 99.01%                | 99.02%                |
